# Supplementary material for: Automated Tumour Recognition and Digital Pathology Scoring Unravels New Role for PD-L1 in Predicting Good Outcome in ER-/HER2+ Breast Cancer
Source: Hindawi journal article supplement (doi:10.1155/2018/2937012), 2018-12-17
Supplement: f1 [file 2937012.f1.pdf]

Supp Figure 1

(A)

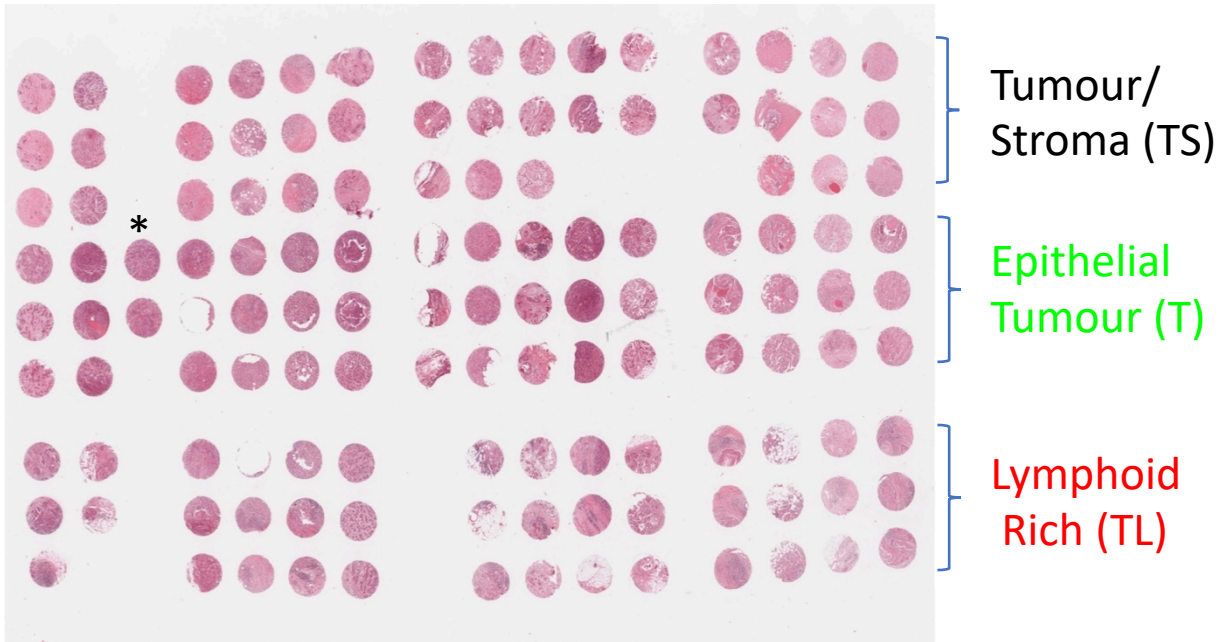

(B)(i)

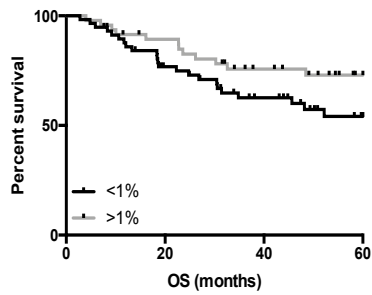

(ii)

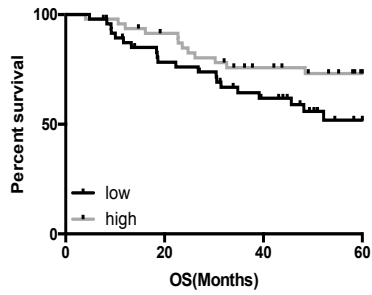

(C)

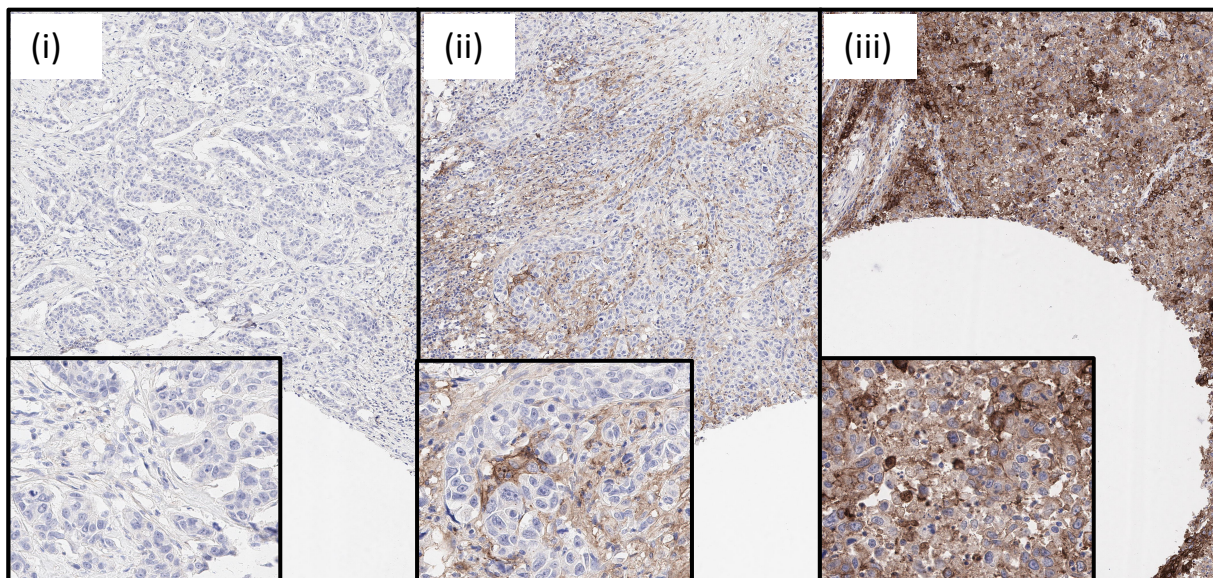

## Supp Figure 2

(A)(i)

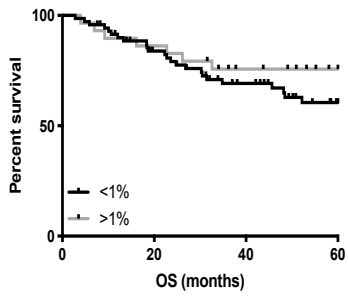

(ii)

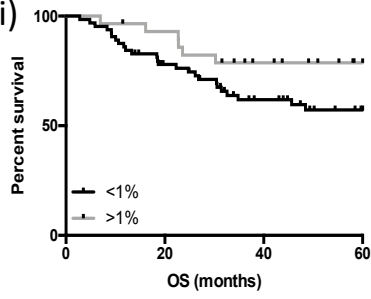

(iii)

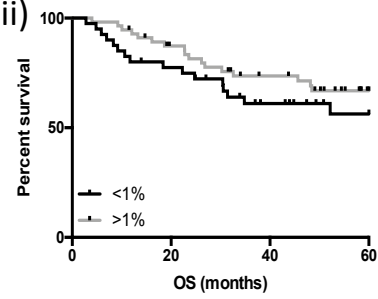

(B)(i)

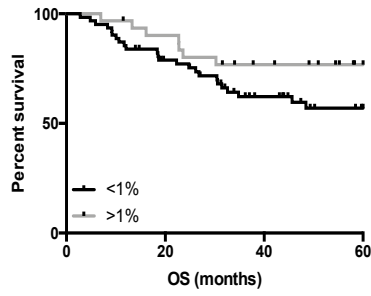

(ii)

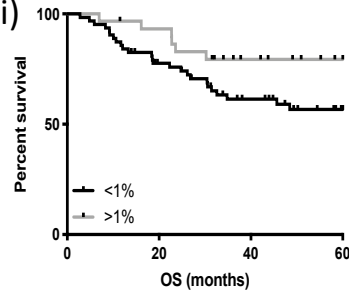

(C)(i)

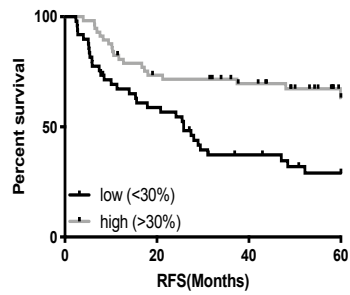

(ii)

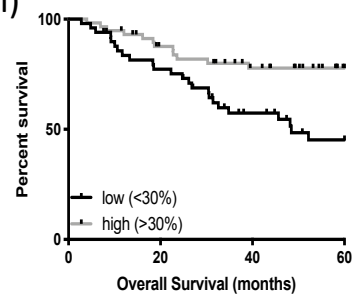

### Supplementary Figure 3

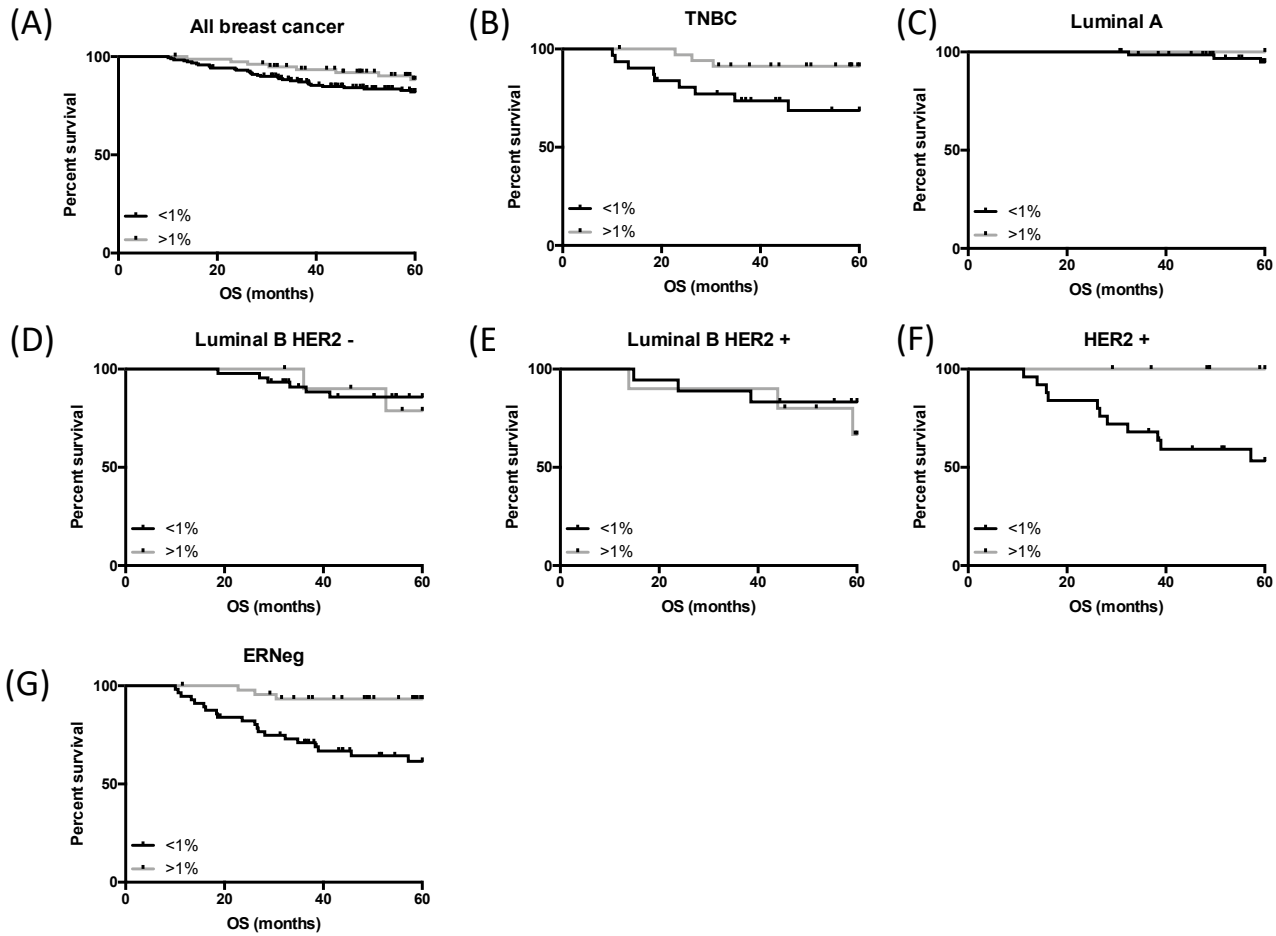

Supp Table 1:  
(a) 9 core TNBC TMA

| Variable (N=109)   | N (%)         |
|--------------------|---------------|
| Age (mean (range)) | 56.69 (28-90) |
| Grade N(%)         |               |
| G2                 | 13 (11.9)     |
| G3                 | 96 (88.1)     |
| T code N(%)        |               |
| T1                 | 31 (28.5)     |
| T2                 | 53 (48.6)     |
| T3                 | 19 (17.4)     |
| T4                 | 6 (5.5)       |
| N code N(%)        |               |
| N0                 | 63 (57.8)     |
| N1                 | 29 (26.6)     |
| N2                 | 8 (7.35)      |
| N3                 | 8 (7.35)      |
| Unknown            | 1 (0.9)       |
| Chemotherapy       |               |
| None               | 18 (16.5)     |
| FEC                | 81 (74.3)     |
| FEC-D              | 9 (8.3)       |
| AC                 | 1 (0.9)       |

(b) 300 breast cohort

| Variable ( <i>N</i> = 293)   | <i>N</i> (%) |
|------------------------------|--------------|
| Tumour grade                 |              |
| G1                           | 5 (2)        |
| G2                           | 119 (41)     |
| G3                           | 169 (58)     |
| pN stage (nodal involvement) |              |
| N0                           | 127 (43)     |
| N1mi                         | 4 (1)        |
| N1                           | 95 (32)      |
| N2                           | 38 (13)      |
| N3                           | 29 (10)      |
| pT stage                     |              |
| T1                           | 65 (22)      |
| T2                           | 181 (62)     |
| T3                           | 41 (14)      |
| T4                           | 6 (2)        |
| Histological type            |              |
| Ductal (no special type)     | 230 (78)     |
| Lobular (no special type)    | 31 (11)      |
| Mixed ductal and lobular     | 25 (9)       |
| Other                        | 7 (2)        |
| ER status (at diagnosis)     |              |
| Positive                     | 175 (60)     |
| Negative                     | 115 (39)     |
| Unknown                      | 3 (1)        |
| PR status (at diagnosis)     |              |
| Positive                     | 115 (39)     |
| Negative                     | 139 (47)     |
| Unknown                      | 39 (13)      |
| HER2 status (at diagnosis)   |              |
| Positive                     | 75 (26)      |
| Negative                     | 192 (66)     |
| Unknown                      | 26 (9)       |

Supp Table 2:

| Antibody | Company/Clone                                              | Platform/pre-treatment/dilution | Detection chemistry         | Mono-/polyclonal     | Epitope                                                                                                              |
|----------|------------------------------------------------------------|---------------------------------|-----------------------------|----------------------|----------------------------------------------------------------------------------------------------------------------|
| ER       | Ventana/SP1                                                | BenchMark/CC1<br>60mins         | Ultraview                   | Rabbit<br>Monoclonal | synthetic peptide corresponding to the C-terminal                                                                    |
| PR       | Ventana/1E2                                                | BenchMark/CC1<br>60mins         | Ultraview                   | Rabbit<br>Monoclonal | Synthetic peptide identified as an area of potential high antigenicity common to progesterone receptor A and B forms |
| HER2     | Ventana/4B5                                                | BenchMark/CC1<br>30mins         | Ultraview                   | Rabbit<br>Monoclonal | Internal domain of HER2                                                                                              |
| PDL1     | Ventana /SP142 (originally sourced from Spring Bioscience) | BenchMark/CC1<br>56mins/1:40    | Optiview with amplification | Rabbit<br>Monoclonal | Synthetic peptide derived from C-terminus                                                                            |
| PDL1     | Abcam/28-8                                                 | BenchMark/CC1<br>56mins/1:800   | Optiview with amplification | Rabbit<br>Monoclonal | extracellular domain of PDL1 (Phe19-Thr239)                                                                          |
| PDL1     | Cell Signalling /405.9A11                                  | BenchMark/CC1<br>56mins/1:20    | Optiview with amplification | Mouse<br>Monoclonal  | Synthetic peptide derived from C-terminus                                                                            |

Supp Table 3:

|                                      | PDL1<br>Abcam<br>Benchmark         | PDL1<br>Abcam<br>Bondmax        | PDL1 SP142<br>Benchmark         | PDL1 SP142<br>Bondmax          | PDL1 Cell<br>Signalling<br>Benchmark | PDL1 Cell<br>Signalling<br>Bondmax |
|--------------------------------------|------------------------------------|---------------------------------|---------------------------------|--------------------------------|--------------------------------------|------------------------------------|
| PDL1<br>Abcam<br>Benchmark           |                                    | 0.7707<br>(95%CI 0.4066-0.9233) | 0.8254<br>(95%CI 0.5775-0.9541) | 0.8285<br>95%CI 0.5215-0.9456  | 0.7718<br>(95% CI 0.4089 - 0.9239)   | 0.8571<br>(95%CI 0.5843 - 0.9558)  |
| PDL1<br>Abcam<br>Bondmax             | 0.7707<br>(95%CI 0.4066-0.9233)    |                                 | 0.9826<br>95%CI 0.9407-0.0049   | 0.9908<br>95%CI 0.9683-0.9973  | 0.9992<br>(95%CI 0.9971-0.9997)      | 0.9774<br>95%CI 0.9238-0.9934      |
| PDL1 SP142<br>Benchmark              | 0.8254<br>(95%CI 0.5775-0.9541)    | 0.9826<br>95%CI 0.9407-0.0049   |                                 | 0.9973<br>95%CI 0.9905-0.9992) | 0.9823<br>95%CI 0.9501-0.9949        | 0.9985<br>95%CI 0.9947-0.9995      |
| PDL1 SP142<br>Bondmax                | 0.8285<br>95%CI 0.5215-0.9456      | 0.9908<br>95%CI 0.9683-0.9973   | 0.9973<br>95%CI 0.9905-0.9992)  |                                | 0.9908<br>95%CI 0.9680-0.9974        | 0.9961<br>95%CI 0.9864-0.9989      |
| PDL1 Cell<br>Signalling<br>Benchmark | 0.7718<br>(95% CI 0.4089 - 0.9239) | 0.9992<br>(95%CI 0.9971-0.9997) | 0.9823<br>95%CI 0.9501-0.9949   | 0.9908<br>95%CI 0.9680-0.9974  |                                      | 0.9772<br>95% CI 0.9226-0.9934)    |
| PDL1 Cell<br>Signalling<br>Bondmax   | 0.8571<br>(95%CI 0.5843 - 0.9558)  | 0.9774<br>95%CI 0.9238-0.9934   | 0.9985<br>95%CI 0.9947-0.9995   | 0.9961<br>95%CI 0.9864-0.9989  | 0.9772<br>95% CI 0.9226-0.9934)      |                                    |

Supp Table 4a

| Relapse Free Survival               |      |               | Univariate |              |         |
|-------------------------------------|------|---------------|------------|--------------|---------|
| All core types - Overall core score |      |               | HR         | 95% CI       | p-value |
| SP142                               |      | N(n)104 (52)  |            |              |         |
| PDL1                                | >1%  | 46 (18)       | 1          |              |         |
|                                     | <1%  | 58 (34)       | 0.536      | 0.316-0.94   | 0.0294* |
| RNAScope                            |      | N (n) 96 (45) |            |              |         |
| PDL1                                | high | 48 (19)       | 1          |              |         |
|                                     | low  | 48 (26)       | 0.632      | 0.352- 1.136 | 0.1258  |

Supp Table 4b

| Overall Survival                    |      |               | Univariate |              |         |
|-------------------------------------|------|---------------|------------|--------------|---------|
| All core types - Overall core score |      |               | HR         | 95% CI       | p-value |
| SP142                               |      | N(n)104 ()    |            |              |         |
| PDL1                                | >1%  | 46 (12)       | 1          |              |         |
|                                     | <1%  | 58 (23)       | 0.548      | 0.288- 1.084 | 0.0858  |
| RNAScope                            |      | N (n) 96 (32) |            |              |         |
| PDL1                                | high | 48 (12)       | 1          |              |         |
|                                     | low  | 48 (20)       | 0.519      | 0.260-1.045  | 0.0669  |

Supp Table 5

| Relapse Free Survival |     |          | Univariate |             |         |
|-----------------------|-----|----------|------------|-------------|---------|
| 9 core TMA SP142      |     |          | HR         | 95% CI      | p-value |
| TS Cores              |     | 100 (47) |            |             |         |
| PDL1                  | >1% | 29 (11)  | 1          |             |         |
|                       | <1% | 71 (38)  | 0.640      | 0.360-1.225 | 0.1914  |
| T cores               |     | 93 (45)  |            |             |         |
| PDL1                  | >1% | 29 (9)   | 1          |             |         |
|                       | <1% | 64 (36)  | 0.445      | 0.271-0.917 | 0.0255* |
| TL cores              |     | 96 (49)  |            |             |         |
| PDL1                  | >1% | 56 (24)  | 1          |             |         |
|                       | <1% | 40 (25)  | 0.562      | 0.305-0.972 | 0.0405* |
| T cores tumour region |     | 93 (45)  |            |             |         |
| PDL1                  | >1% | 31 (10)  | 1          |             |         |
|                       | <1% | 62 (35)  | 0.455      | 0.274-0.909 | 0.0237* |
| T cores stroma region |     | 93 (45)  |            |             |         |
| PDL1                  | >1% | 30 (9)   | 1          |             |         |
|                       | <1% | 63 (36)  | 0.421      | 0.260-0.872 | 0.0164* |

Supp Table 5b

| Overall Survival      |     |         | Univariate |             |         |
|-----------------------|-----|---------|------------|-------------|---------|
| 9 core TMA SP142      |     | N(n)    | HR         | 95% CI      | p-value |
| TS Cores              |     | 100(31) |            |             |         |
| PDL1                  | >1% | 29 (7)  | 1          |             |         |
|                       | <1% | 71 (24) | 0.631      | 0.308-1.402 | 0.2785  |
| T cores               |     | 93 (31) |            |             |         |
| PDL1                  | >1% | 29 (6)  | 1          |             |         |
|                       | <1% | 64 (25) | 0.457      | 0.244-1.074 | 0.0767  |
| TL cores              |     | 96 (33) |            |             |         |
| PDL1                  | >1% | 56 (17) | 1          |             |         |
|                       | <1% | 40 (16) | 0.668      | 0.326-1.326 | 0.2426  |
| T cores tumour region |     | 93 (31) |            |             |         |
| PDL1                  | >1% | 31 (7)  | 1          |             |         |
|                       | <1% | 62 (24) | 0.505      | 0.262-1.133 | 0.1040  |
| T cores stroma region |     | 93 (31) |            |             |         |
| PDL1                  | >1% | 30 (6)  | 1          |             |         |
|                       | <1% | 63 (25) | 0.434      | 0.236-1.026 | 0.0586  |

Supp Table 5b

| Relapse Free Survival |      |         | Univariate |             |         |
|-----------------------|------|---------|------------|-------------|---------|
|                       |      | N(n)    | HR         | 95% CI      | p-value |
| TILs                  | >30% | 57 (19) | 1          |             |         |
|                       | <30% | 49 (33) | 0.3787     | 0.2173-0.66 | 0.0004  |
| Overall Survival      |      | N(n)    | HR         | 95% CI      | p-value |
| TILs                  | >30% | 58 (23) | 1          |             |         |
|                       | <30% | 50 (24) | 0.3712     | 0.192-0.719 | 0.0034  |

Supp Table 6a

| Relapse Free Survival |     |          | Univariate         |             |          |
|-----------------------|-----|----------|--------------------|-------------|----------|
| Breast 300 TMA SP142  |     | N(n)     | HR                 | 95% CI      | p-value  |
| All breast            |     | 268 (65) |                    |             |          |
| PDL1                  | >1% | 78 (13)  | 1                  |             |          |
|                       | <1% | 190 (53) | 0.547              | 0.350-0.994 | 0.0477*  |
| Luminal A             |     | 78 (10)  |                    |             |          |
| PDL1                  | >1% | 10 (0)   | 1                  |             |          |
|                       | <1% | 68 (10)  | 0.314 <sup>†</sup> | 0.051-1.928 | 0.2112   |
| Luminal B HER2-       |     | 66 (14)  |                    |             |          |
| PDL1                  | >1% | 11 (2)   | 1                  |             |          |
|                       | <1% | 55 (12)  | 0.620              | 0.183-2.381 | 0.5272   |
| Luminal B HER2 +      |     | 28 (9)   |                    |             |          |
| PDL1                  | >1% | 10 (2)   | 1                  |             |          |
|                       | <1% | 18 (7)   | 0.484              | 0.136-2.041 | 0.3550   |
| HER2 +                |     | 36 (12)  |                    |             |          |
| PDL1                  | >1% | 11 (2)   | 1                  |             |          |
|                       | <1% | 25 (10)  | 0.350              | 0.131-1.378 | 0.1553   |
| TNBC                  |     | 67 (21)  |                    |             |          |
| PDL1                  | >1% | 35 (7)   | 1                  |             |          |
|                       | <1% | 32 (14)  | 0.355              | 0.148-0.841 | 0.0190*  |
| ER -                  |     | 103 (33) |                    |             |          |
| PDL1                  | >1% | 46 (9)   | 1                  |             |          |
|                       | <1% | 57 (24)  | 0.360              | 0.195-0.761 | 0.0063** |

<sup>†</sup> Mantel-Haenszel HR reported



Supp Table 6b

| Overall Survival     |          |          | Univariate |              |           |
|----------------------|----------|----------|------------|--------------|-----------|
| Breast 300 TMA SP142 | N(n)     | HR       | 95% CI     | p-value      |           |
| All breast           | 268 (40) |          |            |              |           |
| PDL1                 | >1%      | 78 (8)   | 1          |              |           |
|                      | <1%      | 190 (32) | 0.584      | 0.316-1.224  | 0.1695    |
| Luminal A            | 78 (3)   |          |            |              |           |
| PDL1                 | >1%      | 10 (0)   | 1          |              |           |
|                      | <1%      | 68 (3)   | 0.314†     | 0.0115-8.576 | 0.4714    |
| Luminal B HER2-      | 66 (8)   |          |            |              |           |
| PDL1                 | >1%      | 11 (2)   | 1          |              |           |
|                      | <1%      | 55 (6)   | 1.297      | 0.237-7.38   | 0.7493    |
| Luminal B HER2 +     | 28 (6)   |          |            |              |           |
| PDL1                 | >1%      | 10 (3)   | 1          |              |           |
|                      | <1%      | 18 (3)   | 1.85       | 0.360-10.30  | 0.4437    |
| HER2 +               | 36 (11)  |          |            |              |           |
| PDL1                 | >1%      | 11 (0)   | 1          |              |           |
|                      | <1%      | 25 (11)  | 0.215†     | 0.062-0.745  | 0.0153*   |
| TNBC                 | 67 (12)  |          |            |              |           |
| PDL1                 | >1%      | 35 (3)   | 1          |              |           |
|                      | <1%      | 32 (9)   | 0.255      | 0.087-0.861  | 0.0269*   |
| ER -                 | 103 (23) |          |            |              |           |
| PDL1                 | >1%      | 46 (3)   | 1          |              |           |
|                      | <1%      | 57 (20)  | 0.154      | 0.103-0.526  | 0.0005*** |

† Mantel-Haenszel HR reported

Supp Table 6c

| Relapse Free Survival |      |          | Multivariate- Stepwise regression |             |          |
|-----------------------|------|----------|-----------------------------------|-------------|----------|
| ER Neg SP142          | N(n) | 103 (33) | HR                                | 95% CI      | p-value  |
| PDL1                  | >1%  | 57 (24)  | 1                                 |             |          |
|                       | <1%  | 46 (9)   | 0.386                             | 0.179-0.833 | 0.0153*  |
| Lymph node            | no   | 54 (10)  | 1                                 |             |          |
|                       | yes  | 49 (23)  | 0.308                             | 0.146-0.651 | 0.0020** |

Supp Table 6d

| Overall Survival |      |          | Multivariate- Stepwise Regression |             |           |
|------------------|------|----------|-----------------------------------|-------------|-----------|
| ER Neg SP142     | N(n) | 103 (23) | HR                                | 95% CI      | p-value   |
| PDL1             | >1%  | 57 (20)  | 1                                 |             |           |
|                  | <1%  | 46 (3)   | 0.185                             | 0.055-0.942 | 0.00656** |
| Lymph node       | no   | 54 (4)   | 1                                 |             |           |
|                  | yes  | 49 (19)  | 0.189                             | 0.064-0.56  | 0.00263** |
